# Supplementary material
Source: PubMed Central journal article supplement (PMC2846037)
Supplement: JCI38322sd.pdf [file JCI38322sd.pdf]

Table S1. List of genes up- or down-regulated in H99 when bound by 18B7.

| <u>Up-regulated Genes</u>                                            | <u>Classification</u> |
|----------------------------------------------------------------------|-----------------------|
| CNF03470: Formate dehydrogenase                                      | Metabolism            |
| CNC03960: Phosphate transporter, putative                            | Metabolism            |
| CND00530: Putative urea transporter                                  | Secretion             |
| CNA02250: Ammonium transporter MEP1                                  | Secretion             |
| CNC06440: Inositol 1-phosphate synthase                              | Metabolism            |
| CND03490: Chitin deacetylase-like mannoprotein MP98                  | Cell wall             |
| CNA04560: Hypothetical protein                                       | Hypothetical          |
| CNF02180: Acetyl-CoA carboxylase, putative                           | Metabolism            |
| CNJ00690: Uracil permease, putative                                  | Secretion             |
| CNF02510: Alcohol dehydrogenase, putative                            | Metabolism            |
| CNE04360: Fatty acid synthase, alpha subunit-related                 | Metabolism            |
| CNM00180: Cyclohydrolase, putative                                   | Metabolism            |
| CNL03740: AF540951 catalase isozyme P                                | Stress                |
| CNE04370: Fatty acid synthase, beta subunit                          | Metabolism            |
| CNA01790: Expressed protein                                          | Hypothetical          |
| CNA05700: Expressed protein                                          | Hypothetical          |
| CND03840: Vacuole fusion, non-autophagic-related protein, putative   | Cell wall             |
| CNM00980: Hypothetical protein                                       | Hypothetical          |
| CNI02420: Uricase (Urate oxidase), putative                          | Metabolism            |
| CNJ01090: Xylitol dehydrogenase-related                              | Cell wall             |
| CNC03430: Alpha-1,6-mannosyltransferase, putative                    | Cell wall             |
| CNF04120: Expressed protein                                          | Hypothetical          |
| CNB01810: Short chain dehydrogenase, putative                        | Metabolism            |
| CNJ01200: Hypothetical protein                                       | Hypothetical          |
| CNA01160: LSDR putative                                              | Metabolism            |
| CNH03430: Hypothetical protein                                       | Hypothetical          |
| CNM02410: Putative proteine disulfate isomerase                      | Housekeeping          |
| CNG04200: Alpha-amylase, putative                                    | Cell wall             |
| CNC00920: NADP-dependent glutamate dehydrogenase                     | Metabolism            |
| 166_3.seq.171                                                        | Hypothetical          |
| CNC06430: Dehydrogenase                                              | Metabolism            |
| CNG02940: Glycine-rich RNA binding protein                           | Housekeeping          |
| CNG02940: Glycine-rich RNA binding protein-related                   | Housekeeping          |
| CNI02000: Glycerophosphodiester phosphodiesterase, putative          | Metabolism            |
| CNF04890: Predicted dehydrogenase                                    | Metabolism            |
| CNF01860: Proteasome subunit alpha type 4                            | Metabolism            |
| CND06130: Beta-glucan synthesis-associated protein                   | Cell wall             |
| CNE03100: Phosphoketolase                                            | Metabolism            |
| <br>                                                                 |                       |
| <u>Down-regulated genes</u>                                          |                       |
| CNJ02710: Membrane protein                                           | Cell wall             |
| CNK03460: PQQ enzyme repeat, putative                                | Cell wall             |
| CNI01300: 2,4-dichlorophenoxyacetate alpha-ketoglutarate dioxygenase | Metabolism            |
| CNC02990: DNA-directed RNA polymerase                                | Housekeeping          |
| CNI01950: Acetyltransferase                                          | Cell wall             |

Table S2. Comparison of Gene Fold Changes from Microarray & Real-time PCR for 18B7 binding H99.

| Gene     | Gene Description                            | Microarray FC <sup>a</sup> | QRT-PCR<br>FC <sup>b</sup> | QRT-PCR FC-2 | Same pattern<br>(up or down) |
|----------|---------------------------------------------|----------------------------|----------------------------|--------------|------------------------------|
|          |                                             | H99-18B7                   | H99-18B7                   | H99-18B7     | Microarray vs QRT-PCR?       |
| CNI01300 | 2, 4-dichlorophenoxyacetate dioxygenase     | 0.47                       | 0.61                       | 0.70         | Yes                          |
| CNI01950 | Acetyltransferase                           | 0.38                       | 0.97                       | 0.77         | No                           |
| CND03490 | MP98                                        | 3.08                       | 3.54                       | 3.84         | Yes                          |
| CND00530 | Urea transporter                            | 3.57                       | 11.50                      | 12.75        | Yes                          |
| CNE04360 | Fatty acid synthase, alpha subunit-related* | 2.66                       | 1.95                       | 1.28         | Yes                          |
| CNE04370 | Fatty acid synthase, beta subunit*          | 2.50                       | 2.51                       | 2.78         | Yes                          |
| CNC03960 | Inorganic phosphate transporter             | 3.93                       | 1.93                       | 2.49         | Yes                          |
| CNC06440 | Inositol 1-phosphate synthase               | 3.12                       | 3.17                       | 2.87         | Yes                          |
| CNC02990 | DNA-directed rna polymerase                 | 0.43                       | 0.61                       | 0.50         | Yes                          |
| CNF02180 | Acetyl-CoA carboxylase*                     | 2.87                       | 2.08                       | 1.90         | Yes                          |
| CNF02510 | Alcohol dehydrogenase                       | 2.67                       | 2.01                       | 2.20         | Yes                          |
| CNF03470 | Formate dehydrogenase                       | 5.04                       | 1.27                       | 1.36         | No                           |
| CNA02250 | Ammonium transporter MEP1                   | 3.29                       | 1.48                       | 3.18         | Yes                          |
| CNJ00690 | Uracil permease, putative                   | 2.81                       | 1.02                       | nd           | No                           |

a=Fold Change, b= Quantitative real-time PCR, nd= no data, \* Genes involved in fatty acid synthesis

Table S3. List of genes up-or down-regulated in H99 when bound by 12A1.

| <u>Up-regulated Genes</u>                                              | <u>Classification</u> |
|------------------------------------------------------------------------|-----------------------|
| CNE00710: Mannitol-1-phosphate dehydrogenase, putative                 | Metabolism            |
| CNI03250: GPI anchor biosynthesis-related protein, putative            | Cell Wall             |
| CNC03810: Hypothetical protein                                         | Hypothetical          |
| CNA03300: Hypothetical protein                                         | Hypothetical          |
| CNB02680: Monosaccharide transporter                                   | Secretion             |
| CNC01660: Cytokine inducing-glycoprotein, putative                     | Cell Wall             |
| CNI02030: Probable aspartokinase                                       | Metabolism            |
| CNBB3710: Hypothetical protein                                         | Hypothetical          |
| CND06090: Expressed protein                                            | Hypothetical          |
| 170_3.seq.044                                                          | Hypothetical          |
| CND01310: Conserved hypothetical protein                               | Hypothetical          |
| CNH02940: Hypothetical protein                                         | Hypothetical          |
| CNC06440: Inositol 1-phosphate synthase                                | Metabolism            |
| CNN02330: Hypothetical protein                                         | Hypothetical          |
| CNK03270: Expressed protein                                            | Hypothetical          |
| CNN01010: Malate dehydrogenase                                         | Metabolism            |
| CND02630: Hypothetical protein                                         | Hypothetical          |
| CNBL2280: Hypothetical protein                                         | Hypothetical          |
| CNA05840: Glycosyl hydrolase, putative                                 | Metabolism            |
| CNK01910: Hypothetical protein                                         | Hypothetical          |
| CNBL0970: Hypothetical protein                                         | Hypothetical          |
| 164_1.seq.113                                                          | Hypothetical          |
| 167_3.seq.014                                                          | Hypothetical          |
| CNE00770: Plasma membrane protein, putative                            | Cell Wall             |
| CND00280: Hypothetical protein                                         | Hypothetical          |
| 173_2.seq.080                                                          | Hypothetical          |
| CNBA3520: Hypothetical protein                                         | Hypothetical          |
| CNK00030: Conserved hypothetical protein                               | Hypothetical          |
| CNI01540: Expressed protein                                            | Hypothetical          |
| CNE00430: Expressed protein                                            | Hypothetical          |
| CNH03660: Alpha-amylase AmyA                                           | Metabolism            |
| CNA02640: Expressed protein                                            | Hypothetical          |
| CNA04330: Isovaleryl-CoA dehydrogenase 2, mitochondrial precursor      | Metabolism            |
| CND00700: Argininosuccinate synthase, putative                         | Metabolism            |
| <br><u>Down-regulated Genes</u>                                        |                       |
| CNF03720: C-22 sterol desaturase, putative                             | Metabolism            |
| CNF00310: High-affinity methionine permease                            | Secretion             |
| CNE03290: Probable eukaryotic translation initiation factor 3          | Translation           |
| CND03490: Chitin deacetylase-like mannoprotein MP98                    | Cell Wall             |
| CNL04010: Hypothetical protein                                         | Hypothetical          |
| CNA02480: Conserved hypothetical protein                               | Hypothetical          |
| CNI03990: Hypothetical protein                                         | Hypothetical          |
| CNC00240: Ribosomal large subunit biogenesis-related protein, putative | Translation           |
| CNL05260: Histone_deacetylase_3-related                                | Housekeeping          |

|                                                                                |              |
|--------------------------------------------------------------------------------|--------------|
| CNM00160: Conserved hypothetical protein                                       | Hypothetical |
| CND03040: Conserved hypothetical protein                                       | Hypothetical |
| CNA04950: Conserved hypothetical protein                                       | Hypothetical |
| CNG03650: ATP dependent RNA helicase, putative                                 | Translation  |
| CNB01060: Probable ATP-dependent RNA helicase has1                             | Translation  |
| CNB04530: Conserved hypothetical protein                                       | Hypothetical |
| CNC02410: C-4 methyl sterol oxidase                                            | Metabolism   |
| CNL05530: Hypothetical protein                                                 | Hypothetical |
| CNI03560: Sulfate adenylyltransferase MET3                                     | Metabolism   |
| CNC04600: BC022918 Pgs1-pending protein, putative                              | Metabolism   |
| CNC04510: Conserved hypothetical protein                                       | Hypothetical |
| CNBJ3020: Hypothetical protein                                                 | Hypothetical |
| CNC04220: Hypothetical protein                                                 | Hypothetical |
| CNA01290: rRNA processing-related protein, putative                            | Translation  |
| CNN00480: Chromosome organization and biogenesis -related protein              | Translation  |
| CNB02220: Nucleolus protein, putative, Yna1p                                   | Translation  |
| CNF02210: Expressed protein                                                    | Hypothetical |
| CNG02750: Cytoplasm protein, related to low-temperature viability protein LTV1 | Translation  |
| CNBE1990: Hypothetical protein                                                 | Hypothetical |

Table S4. Comparison of Gene Fold Changes from Microarray & Real-time PCR for 12A1 binding H99.

| Gene     | Gene Description                                                                  | Microarray      | QRT-PCR         | QRT-PCR  | Same pattern<br>(up or down)<br>Microarray vs QRT-<br>PCR? |
|----------|-----------------------------------------------------------------------------------|-----------------|-----------------|----------|------------------------------------------------------------|
|          |                                                                                   | FC <sup>a</sup> | FC <sup>b</sup> | FC-2     |                                                            |
|          |                                                                                   | H99-12A1        | H99-12A1        | H99-12A1 |                                                            |
| CNI02030 | Probable aspartokinase                                                            | 2.96            | 0.69            | 0.45     | No                                                         |
| CNI03250 | GPI anchor biosynthesis-related protein, putative                                 | 3.55            | 0.43            | 0.39     | No                                                         |
| CNI03560 | Sulfate adenylyltransferase MET3                                                  | 0.41            | 0.20            | 0.06     | Yes                                                        |
| CND03490 | Chitin deacetylase-like mannoprotein MP98                                         | 0.49            | 0.79            | 0.87     | Yes                                                        |
| CNM00160 | Ribosomal small subunit biogenesis protein*                                       | 0.46            | 0.22            | 0.18     | Yes                                                        |
| CNE00710 | Mannitol-1-phosphate dehydrogenase                                                | 4.00            | 3.56            | 1.97     | Yes                                                        |
| CNE03290 | Eukaryotic translation initiation factor 3*                                       | 0.49            | 0.31            | 0.26     | Yes                                                        |
| CNE00770 | Plasma membrane protein, putative<br>Related to low-temperature viability protein | 2.18            | 0.77            | 0.27     | No                                                         |
| CNG02750 | LTV1*                                                                             | 0.27            | 0.17            | 0.10     | Yes                                                        |
| CNG03650 | ATP-dependent RNA helicase*                                                       | 0.45            | 0.20            | 0.13     | Yes                                                        |
| CNC00240 | Ribosomal large subunit biogenesis protein*                                       | 0.48            | 0.24            | 0.25     | Yes                                                        |
| CNC04510 | Major facilitator superfamily transporter                                         | 0.39            | 0.20            | 0.15     | Yes                                                        |
| CNC06440 | Inositol 1-phosphate synthase                                                     | 2.56            | 0.25            | 0.38     | No                                                         |
| CNA01290 | rRNA processing-related*                                                          | 0.37            | 0.19            | 0.14     | Yes                                                        |
| CNA05840 | Glycosyl hydrolase, putative                                                      | 2.29            | 1.46            | 0.49     | No                                                         |
| CNA04330 | Isovaleryl-CoA dehydrogenase 2                                                    | 2.20            | 2.11            | 2.06     | Yes                                                        |
| CNN00480 | Related to microtubule-interacting protein                                        | 0.36            | 0.16            | 0.24     | Yes                                                        |
| CNN01010 | Malate dehydrogenase                                                              | 2.40            | 0.86            | 0.43     | No                                                         |
| CNB01060 | Probable ATP-dependent RNA helicase has1*                                         | 0.44            | 0.22            | 0.14     | Yes                                                        |
| CNB02220 | Nucleolus protein, Yna1p*                                                         | 0.36            | 0.18            | 0.08     | Yes                                                        |
| CNB02680 | Monosaccharide transporter                                                        | 3.22            | 0.41            | 0.38     | No                                                         |

a=Fold Change, b= Quantitative Real-Time PCR, \*Genes involved in translation

Table S5. List of genes up-or down-regulated in H99 when bound by 13F1.

| <u>Up-regulated Genes</u>                                                   | <u>Classification</u> |
|-----------------------------------------------------------------------------|-----------------------|
| CNB02680: Monosaccharide transporter                                        | Secretion             |
| CNE00710: Mannitol-1-phosphate dehydrogenase, putative                      | Cell Wall             |
| CNM01780: Meiotic recombination-related protein, putative                   | Replication           |
| CNB05670: Hypothetical protein                                              | Hypothetical          |
| CNH02940: Hypothetical protein                                              | Hypothetical          |
| CNC03810: Hypothetical protein                                              | Hypothetical          |
| CNN01010: Malate dehydrogenase (oxaloacetate-decarboxylating), putative     | Metabolism            |
| CNE03070: UVSB PI-3 kinase                                                  | Replication           |
| CNC01660: Cytokine inducing-glycoprotein, putative                          | Cell Wall             |
| CNF01380: D-hydantoinase (dihydropyrimidinase)                              | Metabolism            |
| CNC04420: Probable argininosuccinate lyase                                  | Metabolism            |
| CNI02030: Probable aspartokinase                                            | Metabolism            |
| 162_1.seq.132                                                               | Hypothetical          |
| 170_3.seq.044                                                               | Hypothetical          |
| CNF00610: Alpha-glucosidase, putative                                       | Metabolism            |
| CNH00420: SD07712p                                                          | Replication           |
| CNC06440: Inositol 3-phosphate synthase                                     | Metabolism            |
| CND01200: Homocitrate synthase, putative                                    | Metabolism            |
| CNBB3710: Hypothetical protein                                              | Hypothetical          |
| CND05980: Nucleoside transporter                                            | Replication           |
| CNA03300: Hypothetical protein                                              | Hypothetical          |
| CNBG0460: Hypothetical protein                                              | Hypothetical          |
| CNM02100: Expressed protein                                                 | Hypothetical          |
| CNC03960: Phosphate transporter, putative                                   | Secretion             |
| CNB05660: Oxidoreductase, putative                                          | Metabolism            |
| CNB04710: Aldehyde reductase                                                | Metabolism            |
| CNK03270: Expressed protein                                                 | Hypothetical          |
| CNA04330: Isovaleryl-CoA dehydrogenase 2, mitochondrial precursor, putative | Metabolism            |
| CNBL2120: Hypothetical protein                                              | Hypothetical          |
| CNF00200: Expressed protein                                                 | Hypothetical          |
| <br>                                                                        |                       |
| <u>Down-regulated Genes</u>                                                 |                       |
| CND04840: Bud site selection-related protein, putative                      | Cell Wall             |
| CNM01410: Hypothetical protein                                              | Hypothetical          |
| CNC04020: Conserved hypothetical protein                                    | Hypothetical          |
| CND04540: Cytoplasm protein, putative                                       | Metabolism            |
| CNA04770: Protein-tyrosine phosphatase cdc14 homolog                        | Replication           |
| CNC02410: C-4 methyl sterol oxidase                                         | Metabolism            |
| CNI03990: Hypothetical protein                                              | Hypothetical          |
| CNC04600: CDP-diacylglycerol-glycerol-3-phosphate 3-phosphatidyltransferase | Cell Wall             |
| CNL05530: Hypothetical protein                                              | Hypothetical          |

Table S6. Comparison of Gene Fold Changes from Microarray & Real-time PCR for 13F1 binding H99.

| Gene     | Gene Description                                                  | Microarray      | QRT-PCR         | QRT-PCR  | Same pattern<br>(up or down)<br>Microarray vs QRT-<br>PCR? |
|----------|-------------------------------------------------------------------|-----------------|-----------------|----------|------------------------------------------------------------|
|          |                                                                   | FC <sup>a</sup> | FC <sup>b</sup> | FC-2     |                                                            |
|          |                                                                   | H99-13F1        | H99-13F1        | H99-13F1 |                                                            |
| CNI02030 | Probable aspartokinase                                            | 2.53            | 0.91            | 1.00     | No                                                         |
| CND01200 | Homocitrate synthase, putative                                    | 2.20            | 0.51            | 0.58     | No                                                         |
| CND05980 | Nucleoside transporter                                            | 2.12            | 0.45            | 0.44     | No                                                         |
| CNM01780 | Meiotic recombination-related protein                             | 3.20            | 2.49            | 2.71     | Yes                                                        |
| CNE00710 | Mannitol-1-phosphate dehydrogenase                                | 3.23            | 2.45            | 2.73     | Yes                                                        |
| CNE03070 | UVSB PI-3 kinase                                                  | 2.82            | 1.07            | 1.01     | No                                                         |
| CNC02410 | C-4 methyl sterol oxidase                                         | 0.46            | 0.85            | 0.96     | No                                                         |
| CNC04420 | Probable argininosuccinate lyase                                  | 2.63            | 1.25            | 0.97     | No                                                         |
| CNC04600 | CDP-diacylglycerol-glycerol-3-phosphate 3-phosphatidyltransferase | 0.43            | 0.98            | 1.11     | No                                                         |
| CNC06440 | Inositol 1-phosphate synthase                                     | 2.24            | 0.41            | 0.91     | No                                                         |
| CNF00610 | Alpha-glucosidase                                                 | 2.35            | 1.63            | 2.11     | Yes                                                        |
| CNA04770 | Protein-tyrosine phosphatase                                      | 0.47            | 0.76            | 0.99     | Yes                                                        |
| CNN01010 | Malate dehydrogenase                                              | 2.90            | 0.31            | 0.67     | No                                                         |
| CNB02680 | Monosaccharide transporter                                        | 3.25            | 0.50            | 0.53     | No                                                         |

a=Fold Change, b= Quantitative real-time PCR

Supplemental Table 7. Real-time RT-PCR primers

| Gene     | 5' Primer               | 3' Primer                 |
|----------|-------------------------|---------------------------|
| CNI01300 | TATCACCCCGAAGTTGTTG     | TCCTTTGTCAATGGTTTTTCG     |
| CNI01950 | GGCAACGTTCCGATAACCA     | GAGTCAGTGAATAAGAGGGGAGAGG |
| CND03490 | TGTGTTACACCTGGTCTCAT    | CTTGATGGCTTTCTGGGTGT      |
| CND00530 | GGTGGTATGCTTCTGGTGCT    | TATGGCAGAAAGGAGCGTGT      |
| CNE04360 | CGTCGACAACCTGTGAAAGTG   | ATTCGGCTCACTCAAGAAGG      |
| CNE04370 | GTCAACGAAGTGGGTGGATT    | AACTGGAGCTCGCCAAAGTA      |
| CNC03960 | AAGCCTGTATAGTTGCTGGTGA  | GTGAAAAATCCGACGCCTAA      |
| CNC06440 | ACATGCTTCCCATGGTTCAC    | CACGGAGCATAGCCTTGTG       |
| CNC02990 | TCTTCGCCAATGCTTTC       | CTTCCCTTGGCAGCCTCT        |
| CNF02180 | GCCCAGTTTATCGGTAAGTTCA  | CCTCCGTAGGAGCTTAGATCG     |
| CNF02510 | CGAACCAAGCGTGTAGGTAT    | TTGCTTCAGAAGAGCAAACATC    |
| CNF03470 | CCAAATGGTCAAAGCGAGTA    | TAGAGAACC GCGAGAACCTG     |
| CNA02250 | TCAACCAACAGGTGAGTTCG    | GAACAAGTAAGCACCCATGC      |
| CNJ00690 | GTTTGGAACTTTGTGAGTTTCTC | TGTCAGCGATCCAGAAAGAA      |
| CNI02030 | TGCTGCTCAGATCATTGACG    | CTTAAAGCAGCAGCGACGAT      |
| CNI03250 | AGTCTGATGGACGTGGGTGT    | GGAGGTGGGGGAGAAAGAG       |
| CNI03560 | CTTACCGAGCGTCAATTGTG    | GTGTAGTCCCGCTCGTTTCT      |
| CND03490 | CTGCTGCCAGTACAGACGTT    | TCCCAGATAGTGGGAAAGA       |
| CNM00160 | GATCTTGGTTTCCAGGATTT    | GAATGACGGTGACAAACTGC      |
| CNE00710 | AGGCTTCGAGATGAACTGTGA   | CGTGGTTGACGAAAGAGACA      |
| CNE03290 | CAGTCGAAACGATTCAAGCA    | TTGCGGCTGAGAACTACACA      |
| CNE00770 | CAGCTGTAATGGTTTCTCATCC  | TTCCCAGACAGGGTCGTAAC      |
| CNG02750 | CAGTCGAAAGACCGAAATCTCT  | AGAGTGCCGCTTCACCTTC       |
| CNG03650 | CTCTCTTGCTCGAACCAAT     | TGAGAGGATGGGTTCTGACTT     |
| CNC00240 | AAGCGACTTGAGGAGCTTGC    | AGCTGCTGAAGCCACGTTT       |
| CNC04510 | CTTGCGGATGTTGTTGGTC     | GCAGTGGCAATGACGATGTA      |
| CNC06440 | GTGTTGGGCTTATGCTCGTC    | TCTTGGTGTGCCAAGAGATG      |
| CNA01290 | CTAAGGGCGGAGCCAAAGT     | CGATAGAAACGCTTGAGCTG      |
| CNA05840 | GCGAGTCCGACCCAGTCT      | AAGATGTCCGCAAATCCAAG      |
| CNA04330 | TCTCGTCTGGGTA TAGGAGAC  | TGAACGACACTTCGGA ACTC     |
| CNN00480 | CAGGAAAGGATACGTGCTTCT   | GAGCAGAGGATGATTGAGCA      |
| CNN01010 | CTTAAGCGGTCAACCTCTCC    | AAATTTTGGAGGTGGGCTTT      |
| CNB01060 | CGTCAATGGA ACTGGTGTCA   | GTGAATGGCCTTG CATGAG      |
| CNB02220 | CGGCAAATCCAGATCAGAC     | GCCAAACAAGGAAAGTGTG       |
| CNB02680 | TTTGCCTGGGCTCTTATCCT    | ATCTTGCCGGCCTTGACATA      |
| CNI02030 | CCAAAATCGTCCGGTTCATA    | CGAGAGACTTGGTCTGCGTA      |
| CND01200 | GCCAAGATGCTTGACGAGTT    | TTGCAGATGGCCTCACAGT       |
| CND05980 | GGCAACTATGATTATGGGGCTCT | TAGAATGGCAGTTCCTTGTCTG    |
| CNM01780 | GATTAAGGGTCTGTCCGAAGC   | CTCGACGGTCTGCAATTTCT      |
| CNE00710 | GGCTTCGAGATGAACTGTGA    | CGTGGTTGACGAAAGAGACA      |
| CNE03070 | CTGCTGGCCGAACGTTAT      | CCGCCTCAATGTACCTTTGT      |
| CNC02410 | CCACGAAATTGTCTATTTTGGGA | GGCTGAAGCTTCCACTTTTG      |
| CNC04420 | CGACCTTTGATGCATGAGT     | AGGCAATAGAGCCCTTGACA      |
| CNC04600 | ACCAAAGGCGAACGGATT      | ACCTGGTTTCCAGCAAAGTG      |
| CNC06440 | ACATGCTTCCCATGGTTCAC    | CACGGAGCATAGCCTTGTG       |
| CNF00610 | ACTCATGGCTGTTGCTGAAG    | GAATATCGAAAGAGAAGGTCTGG   |
| CNA04770 | CTGTTCACTTTGGACGACGA    | GCATGAAACGTAACGCAAG       |
| CNN01010 | CTTAAGCGGTCAACCTCTCC    | AAATTTTGGAGGTGGGCTTT      |
| CNB02680 | TTTGCCTGGGCTCTTATCCT    | ATCTTGCCGGCCTTGACATA      |
